## RESEARCH ARTICLE

# Predicting breast cancer 5-year survival using machine learning: A systematic review

Jiaxin Li<sup>1</sup>, Zijun Zhou<sup>2</sup>, Jianyu Dong<sup>1</sup>, Ying Fu<sup>1</sup>, Yuan Li<sup>1</sup>, Ze Luan<sup>1</sup>, Xin Peng<sup>1\*</sup><sup>1</sup> School of Nursing, Jilin University, Jilin, China, <sup>2</sup> Breast Surgery, Jilin Province Tumor Hospital, Jilin, China\* [pengxin2016@163.com](mailto:pengxin2016@163.com)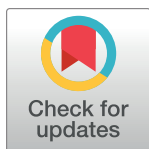

## Abstract

### Background

Accurately predicting the survival rate of breast cancer patients is a major issue for cancer researchers. Machine learning (ML) has attracted much attention with the hope that it could provide accurate results, but its modeling methods and prediction performance remain controversial. The aim of this systematic review is to identify and critically appraise current studies regarding the application of ML in predicting the 5-year survival rate of breast cancer.

### Methods

In accordance with the PRISMA guidelines, two researchers independently searched the PubMed (including MEDLINE), Embase, and Web of Science Core databases from inception to November 30, 2020. The search terms included breast neoplasms, survival, machine learning, and specific algorithm names. The included studies related to the use of ML to build a breast cancer survival prediction model and model performance that can be measured with the value of said verification results. The excluded studies in which the modeling process were not explained clearly and had incomplete information. The extracted information included literature information, database information, data preparation and modeling process information, model construction and performance evaluation information, and candidate predictor information.

### Results

Thirty-one studies that met the inclusion criteria were included, most of which were published after 2013. The most frequently used ML methods were decision trees (19 studies, 61.3%), artificial neural networks (18 studies, 58.1%), support vector machines (16 studies, 51.6%), and ensemble learning (10 studies, 32.3%). The median sample size was 37256 (range 200 to 659820) patients, and the median predictor was 16 (range 3 to 625). The accuracy of 29 studies ranged from 0.510 to 0.971. The sensitivity of 25 studies ranged from 0.037 to 1. The specificity of 24 studies ranged from 0.008 to 0.993. The AUC of 20 studies ranged from 0.500 to 0.972. The precision of 6 studies ranged from 0.549 to 1. All of the models were internally validated, and only one was externally validated.

## OPEN ACCESS

**Citation:** Li J, Zhou Z, Dong J, Fu Y, Li Y, Luan Z, et al. (2021) Predicting breast cancer 5-year survival using machine learning: A systematic review. PLoS ONE 16(4): e0250370. <https://doi.org/10.1371/journal.pone.0250370>

**Editor:** Pascal A. T. Baltzer, Medical University of Vienna, AUSTRIA

**Received:** January 21, 2021

**Accepted:** April 6, 2021

**Published:** April 16, 2021

**Copyright:** © 2021 Li et al. This is an open access article distributed under the terms of the [Creative Commons Attribution License](https://creativecommons.org/licenses/by/4.0/), which permits unrestricted use, distribution, and reproduction in any medium, provided the original author and source are credited.

**Data Availability Statement:** All relevant data are within the manuscript and its [Supporting Information](#) files.

**Funding:** This work was partially supported by Health and Health Science and Technology Innovation Self-funded Project of Jilin Province (grant number: 2020z002) (<http://wsjkw.jl.gov.cn/>). Authors JXL, XP, JYD, YF and YL were co-applicants on this project. This work is partially supported by The Bethune Project of Jilin University (grant number: 2020B38) (<http://jdyxb.jlu.edu.cn/>). Authors JXL, XP, YL, and ZL were co-

applicants on this project. The funder had no role in the design, conduct, analysis or decision to submit for publication.

**Competing interests:** The authors have declared that no competing interests exist.

**Abbreviations:** USA, United States of America; SEER, Surveillance Epidemiology and End Result; AUC, area calculated under the receiver operating characteristic (ROC) curve; ANN, artificial neural network; DT, decision trees; LR, logistic regression; Mcc, Matthew's correlation coefficient; NPV, negative predictive value; FPR, false positive rate; FDR, false discovery rate; FNR, False Negative Rate; MLP, multi-layer perceptron; KNN, K-nearest neighbors; SVM, support vector machines; RF, random forest; DNN, deep neural network; SMOTE, synthetic minority oversampling technique; PSO, particle swarm optimization.

## Conclusions

Overall, compared with traditional statistical methods, the performance of ML models does not necessarily show any improvement, and this area of research still faces limitations related to a lack of data preprocessing steps, the excessive differences of sample feature selection, and issues related to validation. Further optimization of the performance of the proposed model is also needed in the future, which requires more standardization and subsequent validation.

## Introduction

Breast cancer is the most common cancer among women in 154 countries and the main cause of cancer-related death in 103 countries. In 2018, there were approximately 2.1 million new cases of breast cancer in women, accounting for 24.2% of the total cases, and the mortality rate was approximately 15.0% [1].

Survival is defined as the period of time a patient survives after disease diagnosis. The 5-year threshold is important to standardize reporting and to identify survivability. Labelling a patient record as survived or not survived takes at least 5 years, therefore, some previous studies used a 5-year threshold to identify the cohort's survivability [2]. Breast cancer is a complex disease, and although its survival rates in recent years have increased gradually, its 5-year survival rate is considerably different between individuals [3]. Predicting breast cancer survival accurately could help doctors make better decisions regarding medical treatment intervention planning, prevent excessive treatment, thereby reducing economic costs [4, 5], more effectively include and exclude patients in a randomized trial [6], and develop palliative care and hospice care systems [7, 8]. Therefore, predicting survival has become a major issue in current research on breast cancer.

With the surge of medical data as well as the rapid development of information technology and artificial intelligence, the application of big data analysis technology in the construction of survival prediction model has become a current research hotspot. Traditional prediction models based on prior hypothesized knowledge often consider the relationship between dependent variables; in contrast, ML has the potential of learning data models automatically, does not require any implicit assumptions and is able to handle interdependence and nonlinear relationships between variables [9]. It has natural strengths in dealing with the very large number of complex higher-order interactions of medical data. Therefore ML tools have a high potential for application in routine medical practice as leading tools in health informatics.

A growing number of ML studies have been applied to diagnosis [10–13], disease risk prediction [14], recurrence prediction [15], and symptom prediction [16–19]. Furthermore, although the number of survival predictions increases gradually, the database set, modeling process, methodological quality, performance metrics, and modeling of related candidate predictors exhibit large differences [20].

This article aims to systematically and comprehensively review the published literature regarding the use of ML algorithms for model development and validation of breast cancer survival prediction. The primary outcome indicator is the accuracy of the different models in predicting 5-year (60 months or 1825 days) survival rate for breast cancer with the goal of providing a better theoretical basis for the application of ML in survival prediction.

## Methods

### Trial registration

This research was registered in the International Prospective Register of Systematic Reviews (PROSPERO) in November 2020 (CRD42020219154). <https://www.crd.york.ac.uk/PROSPERO/#recordDetails>.

### Search strategy

This research was conducted in accordance with the Preferred Reporting Items for Systematic Reviews and Meta-Analysis (PRISMA) guidelines [20] (see [S1 Table](#)). Two researchers (Jiaxin Li and Jianyu Dong) independently searched PubMed (including MEDLINE) (1966~present), Embase (1980~present), and Web of Science Core Collection (1900~present) databases from inception to November 30, 2020. EndNote X9 software was used to remove duplicate literature. Detailed search strategies are listed in the (see [S2 Table](#)).

### Inclusion and exclusion criteria

The inclusion criteria were as follows: (1) published peer-reviewed literature; (2) research on the clinical diagnosis of breast cancer patients; (3) research related to the use of ML algorithms to build a survival prediction model; (4) prediction models established through the internal or external validation; (5) model performance that can be measured with the value of said verification results; and (6) studies published in English.

The exclusion criteria were as follows: (1) studies in which the training, learning, and/or validation process were not explained clearly or distinguished from each other; (2) duplicate studies; (3) literature reviews; (4) non-human (e.g., animals) studies; (5) case reports; (6) expert experience reports; and (7) unavailable full text or incomplete abstract information such that effective information cannot be extracted.

### Data extraction

Two researchers (Jiaxin Li and Jianyu Dong) independently screened and cross-checked the documents to extract information. If there were differences in the process, then a third party was consulted (Ying Fu). MS office Excel 2019 software was used for basic information literature screening. First, the titles and abstracts were screened to exclude unrelated literature; then, the full texts of articles were read to determine their eligibility for inclusion. The Checklist for critical Appraisal and data extraction for systematic Reviews of prediction Modelling Studies (CHARMS) was also used for data extraction [21], the extracted data include the following:

- Basic literature information: first author, year, country of research, published type, disease characters, and predicted outcome;
- Basic data information: data source, data type, number of centers, and number of samples;
- Data preparation and modeling process information: missing data described, missing data processing described, preprocessing algorithms and preprocessing described, feature selection algorithms and feature selection described, class imbalance (Alive + Dead), number of candidate predictors used, ML algorithms, model presentation, and software or environment used;

- Model construction and performance evaluation information: internal validation, external validation, model evaluation metrics, calibration metrics, hyperparameter tuning, and discrimination and classification metrics; and
- Candidate predictor information: number of candidate predictors, candidate predictors, process for ranking of candidate predictors, and rank of candidate predictors.

### Assessment of the risk of bias

Two researchers used the prediction model risk of bias assessment tool (PROBAST) [22]. PROBAST is mainly used in research and development validation or to update multivariate predictor diagnosis or prognosis prediction models. The tool includes 20 signaling questions across 4 domains (participants, predictors, outcome, and analysis), and each question is answered as low risk of bias assessment, high risk of bias assessment, or unclear.

## Results

### Search results

By searching three medical databases, a total of 8193 studies were identified. After removing duplicates studies. there were leaving 2829 studies and 2656 studies were eliminated based on the screening of titles and abstracts. A comprehensive review of the full text of the remaining 173 studies was conducted, and 142 were excluded for the following reasons: the type of literature did not meet the criteria, i.e., conference abstracts, books, and review literature (n = 9); the predictive outcome was not 5-year survival but recurrence, survival status, benign and malignant tumor diagnosis, or treatment symptoms (n = 91); the full text was unavailable (n = 6); the data were incomplete (n = 14); the study was not published in English (n = 1); or the study included animal research (n = 1). A total of 31 studies met the inclusion criteria [2, 23–52]. The literature screening process is shown in Fig 1.

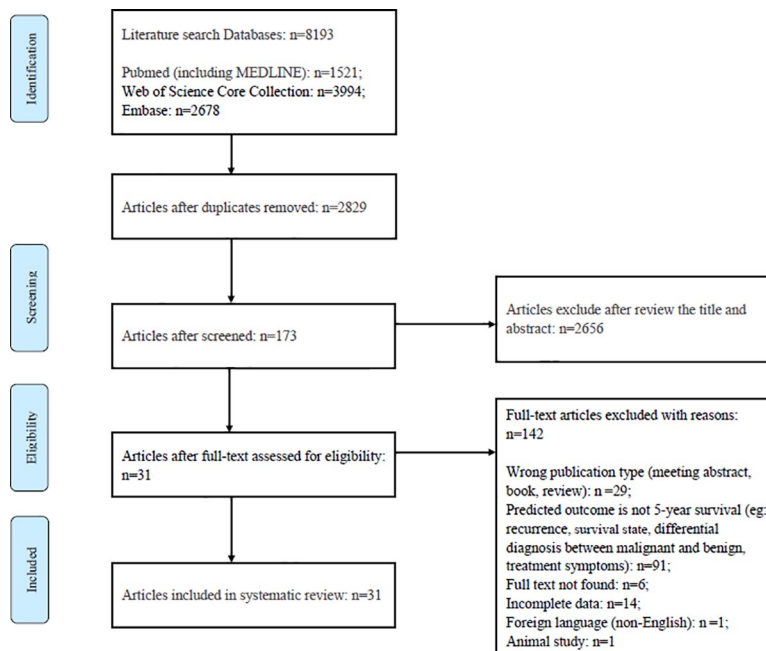

**Fig 1. PRISMA flowchart.**

<https://doi.org/10.1371/journal.pone.0250370.g001>

Table 1. Risk of bias and applicability assessment grading of 31 studies as per the PROBAST criteria.

| Research                     | Participant bias | Predictor bias | Outcome bias | Analysis bias | Overall bias rating | Overall applicability rating |
|------------------------------|------------------|----------------|--------------|---------------|---------------------|------------------------------|
| Delen, 2005 [2]              | Low              | Low            | Low          | High          | High                | Low                          |
| Bellaachia, 2006 [23]        | Low              | Low            | Low          | Low           | Low                 | Low                          |
| Endo, 2007 [24]              | Low              | Low            | Low          | Moderate      | Moderate            | Low                          |
| Khan, 2008 [25]              | Low              | Low            | Low          | High          | High                | Low                          |
| Thongkam, 2008 [26]          | Low              | Low            | Low          | Moderate      | Moderate            | Low                          |
| Choi, 2009 [27]              | Low              | Low            | Low          | High          | High                | Low                          |
| Liu, 2009 [28]               | Low              | Low            | Low          | High          | High                | Low                          |
| Wang, 2013 [29]              | Low              | Low            | Low          | Moderate      | Moderate            | Low                          |
| Kim, 2013 [30]               | Low              | Low            | Low          | Moderate      | Moderate            | Low                          |
| Park, 2013 [31]              | Low              | Low            | Low          | Moderate      | Moderate            | Low                          |
| Shin, 2014 [32]              | Low              | Low            | Low          | Moderate      | Moderate            | Low                          |
| Wang, 2015 [33]              | Low              | Low            | Low          | Moderate      | Moderate            | Low                          |
| Wang, 2014 [34]              | Low              | Low            | Low          | Moderate      | Moderate            | Low                          |
| Chao, 2014 [35]              | Low              | Low            | Low          | Moderate      | Moderate            | Low                          |
| García-Laencina, 2015 [36]   | Low              | Low            | Low          | Low           | Low                 | Low                          |
| Lotfnezhad Afshar, 2015 [37] | Low              | Low            | Low          | Low           | Low                 | Low                          |
| Khalkhali, 2016 [38]         | Low              | Low            | Low          | Low           | Low                 | Low                          |
| Shawky, 2016 [39]            | Low              | Low            | Low          | Moderate      | Moderate            | Low                          |
| Sun, 2018 [40]               | Low              | Low            | Low          | Low           | Low                 | Low                          |
| Sun, 2018 [41]               | Low              | Low            | Low          | Moderate      | Moderate            | Low                          |
| Zhao, 2018 [42]              | Low              | Low            | Low          | Moderate      | Moderate            | Low                          |
| Fu, 2018 [43]                | Low              | Low            | High         | High          | High                | High                         |
| Lu, 2019 [44]                | Low              | Low            | Low          | High          | High                | Low                          |
| Abdikenov, 2019 [45]         | Low              | Low            | Low          | Moderate      | Moderate            | Low                          |
| Kalafi, 2019 [46]            | Low              | Low            | Low          | High          | High                | Low                          |
| Shouket, 2019 [47]           | Low              | Low            | Low          | Moderate      | Moderate            | Low                          |
| Ganggayah, 2019 [48]         | Low              | Low            | Low          | High          | High                | Low                          |
| Simsek, 2020 [49]            | Low              | Low            | Low          | Moderate      | Moderate            | Low                          |
| Salehi, 2020 [50]            | Low              | Low            | Low          | High          | High                | Low                          |
| Tang, 2020 [51]              | Low              | Moderate       | Low          | Moderate      | Moderate            | Moderate                     |
| Hussain, 2020 [52]           | Low              | Low            | Low          | Moderate      | Moderate            | Low                          |

<https://doi.org/10.1371/journal.pone.0250370.t001>

### Assessment of the risk of bias

Among the 31 studies, 9 had a high risk of bias [2, 25, 27, 28, 43, 44, 46, 48, 50], 17 had a moderate risk of bias [24, 26, 29–35, 39, 41, 42, 45, 47, 49, 51, 52], and 5 had a low risk of bias [23, 36–38, 40], as shown in Table 1.

### Primary characteristics of the literature

The primary characteristics of the 31 studies are shown in Table 2. Most of the 31 studies were published from 2013 to 2020, and the statistics regarding the publication year and number of studies are shown in Fig 2. Among them, 22 studies were located in Asia [24, 25, 27–35, 37, 38, 40, 41, 43, 46–48, 50–52], 5 in North America [2, 23, 42, 44, 49], 2 in Oceania [26, 45], 1 in Europe [36], and 1 in Africa [39]. The primary prediction outcome was the 5-year survival of breast cancer patients. The predicted disease types were all breast cancer rather than one particular subtype (e.g., triple-negative breast cancer). All included studies focused on the

Table 2. Primary characteristics and details of the 31 studies (Table 2 was uploaded as an additional file).

| First author, year           | Country of research | Source of data                                       | Number of samples (Alive + Dead) | Missingness processing described | Preprocessing described | Feature selection described | Number of candidate predictors used | ML algorithms                                                                                               | Validation method   | Model evaluation metrics                        | Hyperparameter tuning |
|------------------------------|---------------------|------------------------------------------------------|----------------------------------|----------------------------------|-------------------------|-----------------------------|-------------------------------------|-------------------------------------------------------------------------------------------------------------|---------------------|-------------------------------------------------|-----------------------|
| <b>Delen, 2005</b> [2]       | USA                 | SEER (1973–2000)                                     | 202932 (109659 +93273)           | Yes                              | Yes                     | No                          | 16                                  | ANN; C5 DT; LR                                                                                              | Internal validation | Accuracy; Sensitivity; Specificity              | No                    |
| <b>Bellaachia, 2006</b> [23] | USA                 | SEER (1973–2002)                                     | 151886 (116738 +35148)           | No                               | Yes                     | No                          | 16                                  | Naive Bayes; MLP; C4.5 DT                                                                                   | Internal validation | Accuracy; Sensitivity (Recall); Precision       | No                    |
| <b>Endo, 2008</b> [24]       | Japan               | SEER (1972–1997)                                     | 37256 (30734 +6882)              | No                               | Yes                     | No                          | 10                                  | LR; ANN; Naive Bayes; Bayesian network; DT + Naive Bayes; DT ID3; DT J48                                    | Internal validation | Accuracy; Sensitivity; Specificity              | No                    |
| <b>Khan, 2008</b> [25]       | Korea               | SEER (1973–2003)                                     | 162500 (unknown)                 | Yes                              | Yes                     | No                          | 16                                  | Fuzzy decision trees                                                                                        | Internal validation | Accuracy; Sensitivity; Specificity              | No                    |
| <b>Thongkam, 2008</b> [26]   | Australia           | Srinagarind Hospital records in Thailand (1990–2001) | 732 (342+394)                    | No                               | Yes                     | No                          | 11                                  | C4.5 DTs; Conjunctive rule; Naive Bayes; NN-classifier; random committee; RF; Radial basis function network | Internal validation | Accuracy; AUC                                   | No                    |
| <b>Choi, 2009</b> [27]       | Korea               | SEER (1973–2003)                                     | 294275 (unknown)                 | Yes                              | Yes                     | No                          | 14                                  | ANN; Bayesian network; Hybrid Bayesian network                                                              | Internal validation | Accuracy; Sensitivity; Specificity; AUC         | No                    |
| <b>Liu, 2009</b> [28]        | China               | SEER (1973–2004)                                     | 182517 (157916 +24601)           | Yes                              | Yes                     | Yes                         | 16                                  | C5 DT                                                                                                       | Internal validation | Accuracy; Sensitivity; Specificity; AUC         | No                    |
| <b>Wang, 2013</b> [29]       | China               | SEER (1973–2007)                                     | 215221 (195172 +20049)           | Yes                              | Yes                     | Yes                         | 9                                   | DT; LR                                                                                                      | Internal validation | Accuracy; Sensitivity; Specificity; AUC; G-mean | No                    |
| <b>Kim, 2013</b> [30]        | Korea               | SEER (1973–2003)                                     | 162500 (128469 +34031)           | No                               | Yes                     | No                          | 16                                  | SVM; ANN; Semi-supervised learning; Semi-supervised learning-Co training                                    | Internal validation | Accuracy; AUC                                   | No                    |
| <b>Park, 2013</b> [31]       | Korea               | SEER (1973–2003)                                     | 162500 (128469 +34031)           | No                               | Yes                     | No                          | 16                                  | SVM; ANN; Semi-supervised learning                                                                          | Internal validation | Accuracy; Sensitivity; Specificity; AUC         | Yes                   |

(Continued)

Table 2. (Continued)

| First author, year           | Country of research | Source of data                                                  | Number of samples (Alive + Dead)                                                 | Missingness processing described | Preprocessing described | Feature selection described | Number of candidate predictors used | ML algorithms                                                                | Validation method                | Model evaluation metrics                                | Hyperparameter tuning  |
|------------------------------|---------------------|-----------------------------------------------------------------|----------------------------------------------------------------------------------|----------------------------------|-------------------------|-----------------------------|-------------------------------------|------------------------------------------------------------------------------|----------------------------------|---------------------------------------------------------|------------------------|
| Shin, 2014 [32]              | Korea               | SEER (1973–2003)                                                | 162500 (128469 +34031)                                                           | No                               | Yes                     | No                          | 16                                  | DT; ANN; SVM; Semi-supervised learning; Semi-supervised learning-Co training | Internal validation              | AUC                                                     | Yes                    |
| Wang, 2015 [33]              | China               | Northern Taiwan hospital database (2000–2003)                   | 604 (464+140)                                                                    | Yes                              | Yes                     | Yes                         | 5                                   | ANN                                                                          | Internal validation              | Accuracy; Sensitivity; Specificity; AUC                 | No                     |
| Wang, 2014 [34]              | China               | SEER (1973–2007)                                                | 215221 (195172 +20049)                                                           | No                               | Yes                     | No                          | 20                                  | LR; C5 DT; 1-nearest neighbor                                                | Internal validation              | Accuracy; Sensitivity; Specificity; G-mean              | Yes                    |
| Chao, 2014 [35]              | China               | Breast cancer incidence database in Taiwan hospital (2002–2010) | 1340 (1272+68)                                                                   | No                               | Yes                     | No                          | 7                                   | SVM; LR; C5 DT                                                               | Internal validation              | Accuracy                                                | Yes                    |
| García-Laencina, 2015 [36]   | Spain               | Institute Portuguese of Oncology of Porto                       | 399 (282+117)                                                                    | Yes                              | Yes                     | No                          | 16                                  | KNN; Classification Trees; LR; SVM                                           | Internal validation              | Accuracy; Sensitivity; Specificity; AUC                 | Yes<br>2-D grid search |
| Lotfnezhad Afshar, 2015 [37] | Iran                | SEER (1999–2004)                                                | 22763 (Aliveness values were approximately nine times greater than death values) | Yes                              | Yes                     | No                          | 18                                  | SVM; Bayesian network; Chi-squared Automatic Interaction Detection           | Internal validation              | Accuracy; Sensitivity; Specificity; Adjusted propensity | No                     |
| Khalikhal, 2016 [38]         | Iran                | Omid Treatment and Research Center database (2007–2010)         | 569 (unknown)                                                                    | Yes                              | Yes                     | No                          | 15                                  | Classification and regression tree                                           | Internal validation              | Accuracy; Sensitivity; Specificity                      | No                     |
| Shawky, 2017 [39]            | Egypt               | SEER (2010)                                                     | 4490 (2245 +2245)                                                                | Yes                              | Yes                     | No                          | 14                                  | ANN; KNN; SVM; LR                                                            | Internal validation              | Accuracy; Sensitivity; Specificity; AUC                 | No                     |
| Sun, 2018 [40]               | China               | Molecular Taxonomy of Breast Cancer International Consortium    | 1980 (1489+491)                                                                  | Yes                              | Yes                     | Yes                         | 3 types                             | SVM; RF; LR; DNN                                                             | Internal and external validation | Accuracy; Sensitivity; Precision; Specificity; AUC; Mcc | Yes                    |

(Continued)

Table 2. (Continued)

| First author, year   | Country of research | Source of data                                                                                   | Number of samples (Alive + Dead) | Missingness processing described | Preprocessing described | Feature selection described | Number of candidate predictors used | ML algorithms                                                                                                                                                                                                                                               | Validation method   | Model evaluation metrics                                         | Hyperparameter tuning |
|----------------------|---------------------|--------------------------------------------------------------------------------------------------|----------------------------------|----------------------------------|-------------------------|-----------------------------|-------------------------------------|-------------------------------------------------------------------------------------------------------------------------------------------------------------------------------------------------------------------------------------------------------------|---------------------|------------------------------------------------------------------|-----------------------|
| Sun, 2018 [41]       | China               | The Cancer Genome Atlas                                                                          | 578 (133+445)                    | No                               | Yes                     | Yes                         | 5 types                             | Multiple kernel learning; Regular Cox models; Parametric censored regression models; Random survival forests; Boosting concordance index; Supervised principal components regression                                                                        | Internal validation | Accuracy; Sensitivity; Specificity; Precision; AUC; Mcc; C-index | No                    |
| Zhao, 2018 [42]      | USA                 | Molecular Taxonomy of Breast Cancer International Consortium                                     | 1874 (1409+465)                  | Yes                              | Yes                     | No                          | 27                                  | Gradient Boosting; RF; SVM; ANN                                                                                                                                                                                                                             | Internal validation | Accuracy; AUC                                                    | No                    |
| Fu, 2018 [43]        | China               | The Clinical Research Center for Breast in West China Hospital of Sichuan University (1989–2007) | 5246 (1181 +4065)                | Yes                              | Yes                     | Yes                         | 23                                  | Gradient Boosting; DT framework; SVM; RF; Adaboost; Cox Regression                                                                                                                                                                                          | Internal validation | Cutoff; Youden index; Sensitivity; F-score; Specificity; AUC     | Yes<br>TPE algorithm  |
| Lu, 2019 [44]        | USA                 | SEER (1973–2014)                                                                                 | 82707 (76716 +5991)              | Yes                              | Yes                     | No                          | 14                                  | Genetic algorithm-based online gradient; Online Sequential Extreme Learning Machine; Online Adaptive Boosting with the Adaptive Linear Regressor; Online Gradient Boosting with the Adaptive Linear Regressor; Online linear regressive; AdaBoost; SVM; MLP | Internal validation | Accuracy; Sensitivity; Specificity; AUC; Retraining time         | Yes                   |
| Abdikenov, 2019 [45] | Australia           | SEER (2004–2014)                                                                                 | 659802 (376087 +283715)          | No                               | Yes                     | No                          | 19                                  | DNN; LR; SVM; RF; Gradient Boosting                                                                                                                                                                                                                         | Internal validation | Accuracy; Sensitivity; Specificity; AUC; F1 score                | Yes<br>NSGAIII        |

(Continued)



Table 2. (Continued)

| First author, year          | Country of research | Source of data                                                                            | Number of samples (Alive + Dead)                                       | Missingness processing described | Preprocessing described | Feature selection described | Number of candidate predictors used | ML algorithms                                | Validation method   | Model evaluation metrics                                                         | Hyperparameter tuning |
|-----------------------------|---------------------|-------------------------------------------------------------------------------------------|------------------------------------------------------------------------|----------------------------------|-------------------------|-----------------------------|-------------------------------------|----------------------------------------------|---------------------|----------------------------------------------------------------------------------|-----------------------|
| <b>Kalafi, 2019</b> [46]    | Malaysia            | The University Malaya Medical Centre Breast Cancer Registry database (1993–2017)          | 4902 (2451 +2451)                                                      | Yes                              | Yes                     | No                          | 23                                  | SVM; RF; DT; MLP                             | Internal validation | Accuracy; Sensitivity; Precision; Specificity; F1 score; Mcc; NPV; FPR; FDR; FNR | No                    |
| <b>Shouket, 2019</b> [47]   | Pakistan            | Institute of Nuclear Medicine & Oncology Lahore Hospital of Pakistan database (2013–2018) | 200 (5-year survival: 190+10; 5-year disease free survival: 164 +36)   | No                               | Yes                     | No                          | 10                                  | Naive Bayes; DT J48; SVM; RF; AdaBoost; JRip | Internal validation | Accuracy; Precision; AUC; F-score; Mcc; NPV                                      | No                    |
| <b>Ganggayah, 2019</b> [48] | Malaysia            | The University Malaya Medical Centre Breast Cancer Registry database (1993–2017)          | 8066 (5614 +2452)                                                      | Yes                              | Yes                     | Yes                         | 23                                  | DT (rpart); RF; ANN; XGboost; LR; SVM        | Internal validation | Accuracy; Sensitivity; Specificity; AUC; Precision; Mcc; Calibration curve       | No                    |
| <b>Simsek, 2020</b> [49]    | USA                 | SEER (1973–2013)                                                                          | 53732 (1-year: 52886+886; 5-year: 46724 +7028; 10-year: 42965 +10787.) | Yes                              | Yes                     | Yes                         | 17                                  | ANN; LR                                      | Internal validation | Accuracy; Sensitivity; Specificity; AUC                                          | No                    |
| <b>Salehi, 2020</b> [50]    | Iran                | SEER (2004–2013)                                                                          | 141254 (118324 +22930)                                                 | Yes                              | Yes                     | No                          | 35                                  | MLP; MLP experts; MLP stacked generalization | Internal validation | Accuracy; Sensitivity; Specificity                                               | No                    |

(Continued)

Table 2. (Continued)

| First author, year | Country of research | Source of data                           | Number of samples (Alive + Dead) | Missingness processing described | Preprocessing described | Feature selection described | Number of candidate predictors used | ML algorithms                                                                                                                                                                                                                                           | Validation method   | Model evaluation metrics                         | Hyperparameter tuning |
|--------------------|---------------------|------------------------------------------|----------------------------------|----------------------------------|-------------------------|-----------------------------|-------------------------------------|---------------------------------------------------------------------------------------------------------------------------------------------------------------------------------------------------------------------------------------------------------|---------------------|--------------------------------------------------|-----------------------|
| Tang, 2020 [51]    | China               | Haberman's Survival Data Set (1958–1970) | 306 (unknown)                    | No                               | Yes                     | No                          | 3                                   | Evolutionary dendritic neuron model; MLP; MLP with adaptive learning rate and momentum coefficient; DT; SVM trained by the radial basis function kernel; SVM trained by the linear kernel; SVM trained by the polynomial kernel; Dendritic neuron model | Internal validation | Accuracy; Sensitivity; Specificity; AUC; F-score | Yes                   |
| Hussain, 2020 [52] | Iraq                | SEER (1973–2001)                         | 90308 (unknown)                  | Yes                              | Yes                     | No                          | 17                                  | ANN; DT; LR                                                                                                                                                                                                                                             | Internal validation | Accuracy; Sensitivity; Specificity               | No                    |

<https://doi.org/10.1371/journal.pone.0250370.t002>

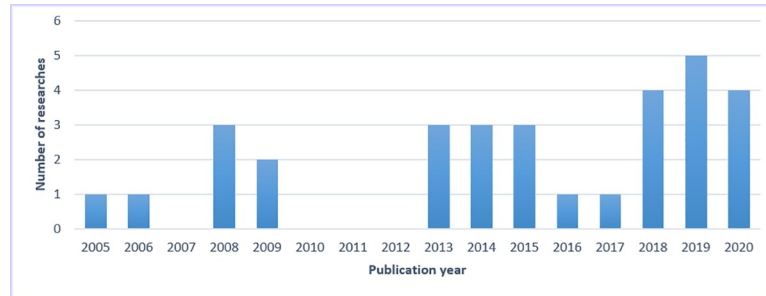

**Fig 2. Number of studies published each year.**

<https://doi.org/10.1371/journal.pone.0250370.g002>

development of survival prediction models using ML algorithms rather than validating the existing models on independent data. Primary characteristics are shown in Tables 2 and 3.

### Primary database information

Eighteen studies used the SEER database [2, 23–25, 27–32, 34, 37, 39, 44, 45, 49, 50, 52], 2 studies used the Molecular Taxonomy of Breast Cancer International Consortium (METABRIC) [40, 42], 1 study used The Cancer Genome Atlas (TCGA) [41], 1 study used Haberman’s Cancer Survival Dataset [51], and 9 studies used hospital registry data [26, 33, 35, 36, 38, 43, 46–48]. The databases of 22 studies were public [2, 23–25, 27–32, 34, 37, 39–42, 44, 45, 49–52], and the databases of 9 studies were private [26, 33, 35, 36, 38, 43, 46–48]. The median sample size used for modeling was 37256 (range 200 to 659802) patients. Seven studies had a sample size of less than 1000 patients [26, 33, 36, 38, 41, 47, 51] (see S3 Table).

### Data preparation and modeling

In total, 31 studies conducted data preprocessing, among which 20 described missing value information and reported missing value processing strategies, including deleting directly, multiple imputation, and nearest neighbor algorithm [2, 25–29, 33, 36–40, 42–44, 46, 48–50, 52]. Eight studies detailed the feature selection process and reported the feature selection method, including a literature review and clinical availability, logistic regression, information gain ratio measurement, threshold-based preselection method and clustering, genetic algorithm, least absolute shrinkage and selectionator operator, and minimal redundancy maximal relevance [28, 29, 33, 40, 41, 43, 48, 49]. One study focused on the processing of outliers, and the algorithms used included the C-support vector classification filter, Adaboost, boosting, Adaboost SVM, and boosting SVM [26].

For the class imbalance, 24 studies showed class imbalance in the samples of the final model construction [2, 23, 24, 26, 28–37, 40–45, 47–50], and 7 of them dealt with this problem [28, 29, 34, 37, 42, 47, 49]. The methods included undersampling, bagging algorithm, SMOTE, PSO, K-means, KNN, and bagging. However, 2 studies used the method of randomly selecting the same number of samples from most classes as that from a few classes to balance the sample size of the two classes before modeling [39, 46], and 5 studies did not provide class imbalance data information [25, 27, 38, 51, 52].

For model presentation, 6 studies were presented as formulas [23, 29, 35, 36, 39, 44], 5 as graphs [24, 38, 47, 48, 52], and 16 as a combination of formulas and graphs [2, 25, 27, 30–32, 34, 40–43, 45, 46, 49–51]. Models were not presented in 4 studies [26, 28, 33, 37].

For the algorithms used in model construction, 5 studies used only one ML algorithm to build the model [25, 28, 33, 38, 50], and 26 studies used two or more ML algorithms and

Table 3. Primary characteristics and categories of the 31 studies.

| Characteristics                       | Categories                                                   | Number (n) | Percentage (%) |
|---------------------------------------|--------------------------------------------------------------|------------|----------------|
| Place of research                     | Asia                                                         | 22         | 71.0           |
|                                       | North America                                                | 5          | 16.1           |
|                                       | Oceania                                                      | 2          | 6.5            |
|                                       | Europe                                                       | 1          | 3.2            |
|                                       | Africa                                                       | 1          | 3.2            |
| Published type                        | Journal article                                              | 27         | 87.1           |
|                                       | Conference paper                                             | 3          | 9.6            |
|                                       | Information paper                                            | 1          | 3.2            |
| Source of data                        | SEER                                                         | 18         | 58.1           |
|                                       | Molecular Taxonomy of Breast Cancer International Consortium | 2          | 6.5            |
|                                       | The Cancer Genome Atlas                                      | 1          | 3.2            |
|                                       | Haberman's Cancer Survival Dataset                           | 1          | 3.2            |
|                                       | Hospital Registration Data                                   | 9          | 29.0           |
| Type of data                          | Public                                                       | 22         | 71.0           |
|                                       | Private                                                      | 9          | 29.0           |
| Number of centers                     | Single center                                                | 22         | 71.0           |
|                                       | Multiple centers                                             | 9          | 29.0           |
| Sample size                           | <1000                                                        | 7          | 22.6           |
|                                       | 1000~10000                                                   | 7          | 22.6           |
|                                       | >10000                                                       | 17         | 54.8           |
| Missing data and processing described | Yes                                                          | 20         | 64.5           |
|                                       | No                                                           | 11         | 35.3           |
| Preprocessing described               | Yes                                                          | 31         | 100.0          |
|                                       | No                                                           | 0          | 0.0            |
| Feature selection described           | Yes                                                          | 8          | 25.8           |
|                                       | No                                                           | 23         | 74.2           |
| Class imbalance processing            | Yes                                                          | 24         | 77.4           |
|                                       | No                                                           | 2          | 6.5            |
|                                       | Unknown                                                      | 5          | 16.1           |
| Number of candidate predictors        | <10                                                          | 4          | 12.9           |
|                                       | 10~100                                                       | 25         | 80.6           |
|                                       | >100                                                         | 2          | 6.5            |
| Number of ML algorithms               | 1                                                            | 5          | 16.1           |
|                                       | >1                                                           | 26         | 83.9           |
| Type of ML algorithms                 | DT                                                           | 19         | 61.3           |
|                                       | ANN                                                          | 18         | 58.1           |
|                                       | SVM                                                          | 16         | 51.6           |
|                                       | LR                                                           | 12         | 38.7           |
|                                       | Bayesian classification algorithms                           | 6          | 19.4           |
|                                       | KNN                                                          | 3          | 9.7            |
|                                       | Semi-supervised learning                                     | 3          | 9.7            |
|                                       | Ensemble learning                                            | 10         | 32.3           |
| DNN                                   | 3                                                            | 9.7        |                |

(Continued)

Table 3. (Continued)

| Characteristics                        | Categories                                           | Number (n) | Percentage (%) |
|----------------------------------------|------------------------------------------------------|------------|----------------|
| <b>Model presentation</b>              | Formula                                              | 6          | 19.4           |
|                                        | Graph                                                | 5          | 16.1           |
|                                        | Formula and graph                                    | 16         | 51.6           |
|                                        | No presentation                                      | 4          | 12.9           |
| <b>Calibration</b>                     | Yes                                                  | 1          | 3.2            |
|                                        | No                                                   | 30         | 96.8           |
| <b>Internal validation</b>             | Yes                                                  | 31         | 100.0          |
|                                        | No                                                   | 0          | 0.0            |
| <b>External validation</b>             | Yes                                                  | 1          | 3.2            |
|                                        | No                                                   | 30         | 96.8           |
| <b>Hyperparameter selection</b>        | Yes                                                  | 9          | 29.0           |
|                                        | No                                                   | 22         | 71.0           |
| <b>Model evaluation metrics</b>        | Accuracy                                             | 29         | 93.5           |
|                                        | Sensitivity/Recall                                   | 25         | 80.6           |
|                                        | Specificity                                          | 24         | 77.4           |
|                                        | AUC                                                  | 20         | 64.5           |
|                                        | Precision/Positive predictive value                  | 6          | 19.4           |
|                                        | F1 score                                             | 5          | 16.1           |
|                                        | Mcc                                                  | 5          | 16.1           |
|                                        | NPV                                                  | 2          | 6.5            |
|                                        | G-mean                                               | 2          | 6.5            |
|                                        | C-index                                              | 1          | 3.2            |
|                                        | Cutoff                                               | 1          | 3.2            |
|                                        | Youden index                                         | 1          | 3.2            |
|                                        | Retaining time                                       | 1          | 3.2            |
|                                        | FPR                                                  | 1          | 3.2            |
| FDR                                    | 1                                                    | 3.2        |                |
| FNR                                    | 1                                                    | 3.2        |                |
| <b>Type of candidate predictors</b>    | Clinical data                                        | 29         | 93.5           |
|                                        | Clinical data + molecular data                       | 1          | 3.2            |
|                                        | Clinical data + molecular data + pathological images | 1          | 3.2            |
| <b>Ranking of candidate predictors</b> | Yes                                                  | 15         | 28.4           |
|                                        | No                                                   | 16         | 51.6           |

<https://doi.org/10.1371/journal.pone.0250370.t003>

compared them [2, 23, 24, 26, 27, 29–32, 34–37, 39–49, 51, 52]. Common ML algorithms included DT (19 studies) [2, 23–26, 28, 29, 32, 34–38, 43, 46–48, 51, 52]; ANN(18 studies) [2, 23, 24, 26, 27, 30–33, 39, 42, 44, 46, 48–52]; SVM (16 studies) [30–32, 35–37, 39, 40, 42–48, 51]; LR (12 studies) [2, 24, 29, 34–36, 39, 40, 45, 48, 49, 52]; Bayesian classification (6 studies) [23, 24, 26, 27, 37, 47], KNN (3 studies) [34, 36, 39]; semisupervised learning (3 studies) [30–32]; ensemble learning including random forest, boosting, and random committee (10 studies) [26, 40–48]; and deep neural network (3 studies) [40, 41, 45] (see S4 Table).

### Information on model construction and performance evaluation

All 31 studies conducted internal validation, of which 27 used cross-validation [2, 23, 24, 26–32, 34–36, 38–47, 49–52], and 4 used random splitting [25, 33, 37, 38]. External validation was

conducted in only one study [40], and model calibration was performed in only 1 study [48]. A total of 9 studies reported trying different hyperparameters on the model [31, 32, 34–36, 40, 43–45], but few studies reported details on hyperparameter tuning.

The common evaluation metrics of ML model classification and discrimination performance were as follows: 29 studies evaluated the accuracy of the model [2, 23–31, 33–42, 44–52], ranging from 0.510 to 0.971; 25 studies evaluated the sensitivity/recall [2, 23–25, 27–29, 31, 33, 34, 36–41, 43–46, 48–52], ranging from 0.037 to 1.000; 24 studies evaluated the specificity [2, 23, 25, 27–29, 31, 33, 34, 36–41, 43–46, 48–52], ranging from 0.008 to 0.993; 20 studies evaluated the AUC [26–34, 36, 39–43, 45, 47–49, 51], ranging from 0.500 to 0.972; 6 studies evaluated the precision/positive predictive value [23, 40, 41, 46–48], ranging from 0.549 to 1; 5 studies evaluated the F1 score [43, 45–47, 51], ranging from 0.369 to 0.966; 5 studies evaluated Mcc [40, 41, 46–48], ranging from 0 to 0.884; 2 studies evaluated the NPV [46, 47], ranging from 0 to 1; and 2 studies evaluated the G-mean [29, 34], ranging from 0.334 to 0.959.

In studies that compared of two or more algorithms, ANN had the best performance in 6 studies [27, 34, 39, 46, 49, 52], DT had the best performance in 4 studies [2, 23, 26, 34], the ensemble learning algorithm had the best performance in 4 studies [42, 43, 48, 51], semisupervised learning had the best performance in 3 studies [30–32], DNN had the best performance in 3 studies [40, 41, 45], SVM had the best performance in 2 studies [35, 37], LR had the best performance in 2 studies [24, 29], KNN had the best performance in 1 study [36], and Naive Bayes had the best performance in 1 study [47] (see S5 Table).

### Candidate predictors

The median number of candidate predictors used was 16 (range: 3–625); 29 studies used only clinical data [2, 23–39, 42–52], 1 study combined clinical data with molecular data for prediction [40], and 1 study combined clinical data, molecular data and pathological image data for prediction [41]. We ranked the frequency of the use of certain predictors from high to low. The commonly used candidate predictors included age, stage of cancer, grade, tumor size, race, marital status, number of nodes, histology, number of positive nodes, primary site code, extension of tumor, behavior/behavior code, lymph node involvement, site-specific surgery code, number of primaries, radiation, received radiation, estrogen receptor (ER) status, and progesterone receptor (PR) status (see Table 4).

Fifteen studies ranked the degree to which the predictors contributed to the outcome [2, 23, 25, 27, 32, 33, 37, 38, 42, 43, 46, 48–50, 52]. Four studies reported sequencing methods, including sensitivity analysis in networks [2, 27], DT information gain measurement [23, 25], sensitivity scores in rules [38], and correlation coefficients [33] (see S6 Table).

### Discussion

To the best of our knowledge, this is the first systematic review of the application of ML to breast cancer survival prediction, and accurate 5-year survival predictions are very important for further research. After a systematic analysis of 31 studies, we found that there is a need for the standardization and validation of the different algorithms of models for predicting breast cancer survival and for the exploration of the significance of applying the predictive model to clinical practice.

Most studies based on authoritative databases use standardized and open-access tumor information that is updated regularly, but the question of whether a model using public databases could be used locally should be considered. In addition, some public databases that were established earlier are problematic because clinical practices change over time, and the use of historical data that are too old or a data collection time period that is too long to develop the

**Table 4. Rank of the candidate predictors used in 31 studies.**

| Rank | Candidate predictor               | Description                                                                                      | Number (n) | Percentage (%) |
|------|-----------------------------------|--------------------------------------------------------------------------------------------------|------------|----------------|
| 1    | Age                               | Age at diagnosis                                                                                 | 26         | 83.9           |
| 2    | Stage of cancer                   | Defined by size of cancer tumor and its spread                                                   | 23         | 74.2           |
| 3    | Grade                             | Appearance of tumors and their differentiability                                                 | 22         | 71.0           |
| 4    | Tumor size                        | Diameter of tumor                                                                                | 21         | 67.7           |
| 5    | Race                              | Recorded race of the patient. Ethnicity: White, Black, Chinese, etc.                             | 19         | 61.3           |
| 6    | Marital status                    | Patient's marital status at the time of diagnosis: Married, single, divorced, widowed, separated | 19         | 61.3           |
| 7    | Number of nodes                   | Total nodes (positive/negative) examined                                                         | 19         | 61.3           |
| 8    | Histology                         | The microscopic composition of cells and/or tissue for a specific primary                        | 18         | 58.1           |
| 9    | Number of positive nodes          | When lymph nodes are involved in cancer, they are called positive                                | 18         | 58.1           |
| 10   | Primary site code                 | Presence of tumor at particular location in body. Topographical classification of cancer         | 17         | 54.8           |
| 11   | Extension of tumor                | Defines spread of tumor relative to breast                                                       | 17         | 54.8           |
| 12   | Behavior/behavior code            | In situ or malignant                                                                             | 15         | 48.4           |
| 13   | Lymph node involvement            | None, minimal, significant, etc.                                                                 | 14         | 45.2           |
| 14   | Site-specific surgery code        | Information on surgery during first course of therapy, whether cancer-directed or not            | 13         | 41.9           |
| 15   | Number of primaries               | Number of primary tumors                                                                         | 13         | 41.9           |
| 16   | Radiation                         | None, beam radiation, radioisotopes, refused, recommended, etc.                                  | 11         | 35.5           |
| 17   | Received radiation                | Whether the patient had been treated with radiotherapy or not                                    | 8          | 25.8           |
| 18   | Estrogen receptor (ER) status     | Breast cancers with this hormone receptor are called "ER positive"                               | 7          | 22.6           |
| 19   | Progesterone receptor (PR) status | Breast cancers with this hormone receptor are called "PR positive"                               | 7          | 22.6           |

<https://doi.org/10.1371/journal.pone.0250370.t004>

model will result in the loss of clinical significance [53]. Therefore, researchers should consider focusing more on data management to improve the speed of building models and consider establishing online real-time prediction models. A small number of studies are based on local hospital registration data, but private data require informed consent and ethics committee approval before sharing as well as proper processing (such as anonymity completely). Therefore, the use of private data prevents other scholars from verifying the results of the model and comparing different models.

The number of samples included in this study is uneven. The minimum sample size is 200 patients, and 7 model samples include less than 1000 patients. ML algorithms are often applied to the processing of multidimensional data, and the default application condition is large sample data [54, 55]. The use of too little data in the training model will often lead to overfitting of the model and reduce the generalization ability. In addition, medical data typically contain a large amount of data, outliers, noise redundancy, imbalance, deletion and irrelevant variables [56]. The original dataset will thus cause poor performance of the subsequent prediction model and will become a bottleneck in the process of data mining. Therefore, the process of data preprocessing, including data reduction, data cleaning, data transformation and data integration, is crucial [57] and typically comprises 70~80% of the workload of data mining [58].

However, many of the studies included in this systematic review did not take these key steps. High-quality models depend on high-quality data. In future studies, researchers should not only select appropriate algorithms and perform performance comparisons but also focus on exploring methods for data cleaning and pretreatment and improving the quality and quantity of the modeling data.

Initially, researchers used traditional ML for model construction and then gradually combined and optimized multiple learning models with weak performance to produce ensemble learning algorithms, which have high prediction accuracy and strong generalization ability [59, 60]. However, the above two algorithms are shallow learning algorithms. Although these algorithms play a role, they are often unable to effectively complete tasks such as high-dimensional data processing and large computations when faced with massive data. Therefore, driven by the background of big data cloud computing, deep learning algorithms have been proposed and have gradually become hotspots in breast cancer prediction research. These algorithms are better able to analyze data and model the complex relationship between prognostic variables. The algorithms include factors that depend on time as well as those that interact with other factors associated with prognosis in a nonlinear manner.

In complex modeling problems, there is generally no single algorithm that fits all problems. Different techniques can be combined to produce the best performance, so researchers must compare different ML algorithms or ML algorithms with traditional modeling algorithms. The most commonly used algorithms in this systematic review are ANN, DT, SVM, LR and ensemble learning. Among them, the performance of ANN and DT is better. However, overall, compared with LR/Cox regression model, the performance of the ML algorithm does not necessarily improve, similar to the results of previous studies [61–63].

Model validation is divided into internal and external validation, and internal validation is performed using the dataset randomly obtained from the original dataset, which can be completed by dividing the sample validation. In this study, most of the included studies used cross-validation and random splitting for internal validation, which makes it difficult to avoid overfitting, thus limiting the accuracy of the validation results [64]. External validation requires the development of the queue based on the independence and validation of samples, which is the gold standard of model performance [65, 66]. We found that only 1 study performed external verification of the model. The lack of external validation in multicenter studies with large samples prevents one from determining whether a model is applicable in different scenarios, which can prevent the use of the model, as well as its stability and universality. Thus, data extrapolation should be performed with caution. The lack of practical application of the model in clinical practice may affect the ability of clinicians to make treatment decisions and estimate prognosis. Calibration compares the observed probability and predicted probability of the occurrence of results, which is the key to model development [67]. Only 1 study performed model calibration, and the actual availability of uncalibrated models is limited [68]. Therefore, it is recommended that researchers consider this step and report modeling information in detail.

Compared with the traditional statistical model, the ML algorithm has the black box property. The interpretation and understanding of the model is a key problem [69]. Researchers have difficulties in knowing what happened in the process of prediction and the resulting process, i.e., which variables had the greatest influence on survival and which subgroups of patients showed similar results. Answering these questions can help doctors choose the appropriate treatment and can also eliminate the non-important factors of breast cancer to reduce the time and cost of data collection and treatment. However, whether this problem exists in most models, especially deep learning models, is unknown [70, 71]. The development of this problem and the complex function of internal work are not easy to explain, leading to



inappropriate evaluation and feedback to improve the output. In contrast, DT models have excellent interpretability, but their performance still needs to be further optimized [51, 72]. Therefore, compared with focusing only on prediction performance, further understanding of the underlying dynamics of the algorithm has become a research hotspot and led to an increasing number of studies being performed [69].

Regarding factors influencing breast cancer prognosis, screening appropriate predictors as independent variables is an important step in model construction. In previous studies, predictors mostly included patients' demographic characteristics, medical history, treatment information, and the clinicopathological characteristics of tumors at different disease stages. In this systematic review, we summarize the most commonly used predictors similar to the results of previous studies [4].

Age, disease stage, grade, tumor size, race, marital status, number of nodes, histology, number of positive nodes and primary site code have been entered into many predictive models as predictors, given that these factors represent key risk factors for onset and survival in breast cancer. These variables were also used in studies on decision-making analysis in relation to breast cancer [73–75]. In the future, the possible mechanisms underlying the occurrence and development of breast cancer could be further studied from these perspectives, which also suggests that more suitable predictors for clinical practice can be identified. The ML predictive models applied in this systematic review can be translated into tools for clinical treatment decision-making. Visualization of some of the outcomes will be implemented in the research database and used by the clinicians at the hospital to analyze the survival of breast cancer patients.

With the development of molecular biology, some molecular indicators, such as gene expression and mutation, have also become predictors. Compared with a single data-driven prediction model, in recent years, researchers have incorporated multiple types of data into prediction. The rapid increase in the number of features from different data sources and the use of heterogeneous features have led to great challenges in survival prediction. With the deepening of research on breast cancer, many new variables that are significantly related to breast cancer prognosis have been gradually discovered [14, 76, 77], such as the level of anxiety and depression. Thus, the above factors should be taken into account in the prediction. This notion illustrates the true complexity of breast cancer as a disease, highlights the importance of the mechanisms involved, and highlights some of the confusion among researchers in selecting the most appropriate prediction model.

The number of candidate predictors and the correlation between them will affect model performance. Therefore, feature selection becomes particularly important. Feature selection identifies the most important variables in the dataset while maintaining classification quality. A reduction in the number of predictors and the burden of data collection can reduce the fitting and complexity of the model and help researchers interpret and understand the model. However, many studies did not report the feature selection process, which may be related to the ability of some classification models to deal with high-dimensional datasets (e.g., RF, SVM, DT), or the features included in the models may have been selected based on prior research or clinical importance [14, 78].

No quality assessment criteria have been established specifically for systematic reviews of ML research. Existing guidelines, such as CHARMS [21] and TRIPOD [79], do not consider the characteristics and related biases of ML models. There have been studies using improved quality assessment criteria to adapt to ML system evaluation [62, 80, 81], but they have not been widely accepted. Therefore, with the increasing application of ML in prediction and other fields, it is recommended that guidelines be developed for reporting and evaluating ML prediction model research in the medical field and to serve as a standard for publication to improve the quality of related papers.

## Limitations

This study has some limitations. First, only English studies were included, so publication bias may be present. Second, the excessive differences of the included studies limit the comparison between studies and prohibits the use of meta-analysis [82, 83]. Finally, most of the included studies did not report the key steps in model development and validation. In addition, the information on predictive performance (such as true positive, false positive, true negative, and false negative in the confusion matrix) was insufficient, and most of the studies only described a single dimension of predictive performance. Therefore, it is recommended that comprehensive methodological information, such as missing value processing, outlier value processing, class imbalance processing, hyperparameter tuning, feature selection variable importance ranking processing, model evaluation and validation, be reported in detail along with the model performance, including detailed information on the suitability and acceptability of classification, discrimination and calibration measures.

## Conclusion

ML has become a new methodology for breast cancer survival prediction, and there is still much room for improvement and potential for further model construction. The existing prediction models still face limitations related to a lack of data preprocessing steps, the excessive differences of sample feature selection, and issues related to validation and promotion. The model performance still needs to be further optimized, and other barriers should be addressed. Researchers and medical workers should connect with reality, choose a model carefully, use the model in clinical practice after verification, and use rigorous design and validation methods with a large sample of high-quality research data on the basis of previous findings. The applicability and limitation of these models should be evaluated strictly to improve the degree of accuracy for breast cancer survival prediction.

## Supporting information

**S1 Table. PRISMA checklist.**

(DOC)

**S2 Table. Search strategy and results.**

(DOCX)

**S3 Table. Primary information of the 31 studies.**

(DOCX)

**S4 Table. Data preparation and modeling process of the 31 studies.**

(DOCX)

**S5 Table. Model construction and performance evaluation of the 31 studies.**

(DOCX)

**S6 Table. Candidate predictors used in the 31 studies.**

(DOCX)

## Acknowledgments

The authors would like to thank the School of Nursing, Jilin University and Jilin Cancer Hospital for their support during this study.

## Author Contributions

**Formal analysis:** Jiaxin Li, Jianyu Dong, Ying Fu, Yuan Li, Ze Luan, Xin Peng.

**Funding acquisition:** Xin Peng.

**Methodology:** Jiaxin Li, Zijun Zhou, Jianyu Dong, Ying Fu, Xin Peng.

**Resources:** Jiaxin Li.

**Software:** Jiaxin Li.

**Supervision:** Xin Peng.

**Writing – original draft:** Jiaxin Li.

**Writing – review & editing:** Zijun Zhou, Xin Peng.

## References

1. Bray F, Ferlay J, Soerjomataram I, Siegel R, Torre L, Jemal A. Global cancer statistics 2018: GLOBOCAN estimates of incidence and mortality worldwide for 36 cancers in 185 countries. *CA: a cancer journal for clinicians*. 2018.
2. Delen D, Walker G, Kadam A. Predicting breast cancer survivability: a comparison of three data mining methods. *Artificial intelligence in medicine*. 2005; 34(2):113–27. <https://doi.org/10.1016/j.artmed.2004.07.002> PMID: 15894176
3. Polyak K. Heterogeneity in breast cancer. *The Journal of clinical investigation*. 2011; 121(10):3786–8. <https://doi.org/10.1172/JCI60534> PMID: 21965334
4. Altman, Douglas G. Prognostic models: a methodological framework and review of models for breast cancer. *Cancer Investigation*. 2009; 27(3):235–43. <https://doi.org/10.1080/07357900802572110> PMID: 19291527
5. Clark GM. Do we really need prognostic factors for breast cancer? *Breast cancer research and treatment*. 1994; 30(2):117–26. <https://doi.org/10.1007/BF00666054> PMID: 7949209
6. Altman DG, Royston P. What do we mean by validating a prognostic model? *Statistics in Medicine*. 2015; 19(4):453–73.
7. Stone P, Lund S. Predicting prognosis in patients with advanced cancer. *Annals of Oncology Official Journal of the European Society for Medical Oncology*. 2007; 18(6):971. <https://doi.org/10.1093/annonc/mdl343> PMID: 17043092
8. Kourou K, Exarchos TP, Exarchos KP, Karamouzis MV, Fotiadis DI. Machine learning applications in cancer prognosis and prediction. *Computational and structural biotechnology journal*. 2015; 13:8–17. <https://doi.org/10.1016/j.csbj.2014.11.005> PMID: 25750696
9. Obermeyer Z, Emanuel EJ. Predicting the Future—Big Data, Machine Learning, and Clinical Medicine. *The New England journal of medicine*. 2016; 375(13):1216–9. <https://doi.org/10.1056/NEJMp1606181> PMID: 27682033
10. Acs B, Rantalainen M, Hartman J. Artificial intelligence as the next step towards precision pathology. *Journal of internal medicine*. 2020; 288(1):62–81. <https://doi.org/10.1111/joim.13030> PMID: 32128929
11. Yassin NIR, Omran S, El Houbay EMF, Allam H. Machine learning techniques for breast cancer computer aided diagnosis using different image modalities: A systematic review. *Computer methods and programs in biomedicine*. 2018; 156:25–45. <https://doi.org/10.1016/j.cmpb.2017.12.012> PMID: 29428074
12. Crowley RJ, Tan YJ, Ioannidis JPA. Empirical assessment of bias in machine learning diagnostic test accuracy studies. *Journal of the American Medical Informatics Association: JAMIA*. 2020; 27(7):1092–101. <https://doi.org/10.1093/jamia/ocaa075> PMID: 32548642
13. Gardezi SJS, Elazab A, Lei B, Wang T. Breast Cancer Detection and Diagnosis Using Mammographic Data: Systematic Review. *Journal of medical Internet research*. 2019; 21(7):e14464. <https://doi.org/10.2196/14464> PMID: 31350843
14. Richter AN, Khoshgoftaar TM. A review of statistical and machine learning methods for modeling cancer risk using structured clinical data. *Artificial intelligence in medicine*. 2018; 90:1–14. <https://doi.org/10.1016/j.artmed.2018.06.002> PMID: 30017512

15. Izci H, Tambuyzer T, Tuand K, Depoorter V, Laenen A, Wildiers H, et al. A Systematic Review of Estimating Breast Cancer Recurrence at the Population Level With Administrative Data. *Journal of the National Cancer Institute*. 2020; 112(10):979–88. <https://doi.org/10.1093/jnci/djaa050> PMID: 32259259
16. Juwara L, Arora N, Gornitsky M, Saha-Chaudhuri P, Velly AM. Identifying predictive factors for neuropathic pain after breast cancer surgery using machine learning. *International journal of medical informatics*. 2020; 141:104170. <https://doi.org/10.1016/j.ijmedinf.2020.104170> PMID: 32544823
17. Yang L, Fu B, Li Y, Liu Y, Huang W, Feng S, et al. Prediction model of the response to neoadjuvant chemotherapy in breast cancers by a Naive Bayes algorithm. *Computer methods and programs in biomedicine*. 2020; 192:105458. <https://doi.org/10.1016/j.cmpb.2020.105458> PMID: 32302875
18. Sutton EJ, Onishi N, Fehr DA, Dashevsky BZ, Sadinski M, Pinker K, et al. A machine learning model that classifies breast cancer pathologic complete response on MRI post-neoadjuvant chemotherapy. *Breast cancer research: BCR*. 2020; 22(1):57. <https://doi.org/10.1186/s13058-020-01291-w> PMID: 32466777
19. Takada M, Sugimoto M, Masuda N, Iwata H, Kuroi K, Yamashiro H, et al. Prediction of postoperative disease-free survival and brain metastasis for HER2-positive breast cancer patients treated with neoadjuvant chemotherapy plus trastuzumab using a machine learning algorithm. *Breast cancer research and treatment*. 2018; 172(3):611–8. <https://doi.org/10.1007/s10549-018-4958-9> PMID: 30194511
20. Phung MT, Tin Tin S, Elwood JM. Prognostic models for breast cancer: a systematic review. *BMC cancer*. 2019; 19(1):230. <https://doi.org/10.1186/s12885-019-5442-6> PMID: 30871490
21. Moons KG, de Groot JA, Bouwmeester W, Vergouwe Y, Mallett S, Altman DG, et al. Critical appraisal and data extraction for systematic reviews of prediction modelling studies: the CHARMS checklist. *PLoS medicine*. 2014; 11(10):e1001744. <https://doi.org/10.1371/journal.pmed.1001744> PMID: 25314315
22. Moons KGM, Wolff RF, Riley RD, Whiting PF, Westwood M, Collins GS, et al. PROBAST: A Tool to Assess Risk of Bias and Applicability of Prediction Model Studies: Explanation and Elaboration. *Annals of internal medicine*. 2019; 170(1):W1–w33. <https://doi.org/10.7326/M18-1377> PMID: 30596876
23. Bellaachia A, E G. Predicting Breast Cancer Survivability Using Data Mining Techniques2006:[1–4 pp.]. Available from: [https://vpns.jlu.edu.cn/http/77726476706e69737468656265737421e3e40f862f3972587b06c7af9758/detail\\_38502727e7500f262131a1f059e6d921db72c3d5948903771921b0a3ea255101e580949000984f4b5e87a378de3a694b55e004485bcadaf0a5d1d4ce4b994fb7beb34a549f1df8f78e7931e8537ccd77?](https://vpns.jlu.edu.cn/http/77726476706e69737468656265737421e3e40f862f3972587b06c7af9758/detail_38502727e7500f262131a1f059e6d921db72c3d5948903771921b0a3ea255101e580949000984f4b5e87a378de3a694b55e004485bcadaf0a5d1d4ce4b994fb7beb34a549f1df8f78e7931e8537ccd77?)
24. Endo A, Shibata T, H T. Comparison of Seven Algorithms to Predict Breast Cancer Survival. *International Journal of Biomedical Soft Computing and Human Sciences: the official journal of the Biomedical Fuzzy Systems Association*. 2008; 13(2):11–6.
25. Khan MU, Choi JP, Shin H, Kim M. Predicting breast cancer survivability using fuzzy decision trees for personalized healthcare. *Annual International Conference of the IEEE Engineering in Medicine and Biology Society IEEE Engineering in Medicine and Biology Society Annual International Conference*. 2008;2008:5148–51.
26. Thongkam J, Xu G, Zhang Y, Huang F, editors. *Support Vector Machine for Outlier Detection in Breast Cancer Survivability Prediction*. *Advanced Web & Network technologies, & Applications*; 2008.
27. Choi J, Han T, Park P. A Hybrid Bayesian Network Model for Predicting Breast Cancer Prognosis. *J Kor Soc Med Informatics*. 2009; 15(1):49–57.
28. Liu YQ, Wang C, Zhang L, editors. *Decision Tree Based Predictive Models for Breast Cancer Survivability on Imbalanced Data*. *International Conference on Bioinformatics & Biomedical Engineering*; 2009.
29. Wang KJ, Makond B, Wang KM. An improved survivability prognosis of breast cancer by using sampling and feature selection technique to solve imbalanced patient classification data. *BMC Med Inform Decis Mak*. 2013; 13:124. <https://doi.org/10.1186/1472-6947-13-124> PMID: 24207108
30. Kim J, Shin H. Breast cancer survivability prediction using labeled, unlabeled, and pseudo-labeled patient data. *Journal of the American Medical Informatics Association: JAMIA*. 2013; 20(4):613–8. <https://doi.org/10.1136/amiajnl-2012-001570> PMID: 23467471
31. Park K, Ali A, Kim D, An Y, Kim M, Shin H. Robust predictive model for evaluating breast cancer survivability. *Engineering Applications of Artificial Intelligence*. 2013; 26(9):2194–205.
32. Shin H, Nam Y. A coupling approach of a predictor and a descriptor for breast cancer prognosis. *BMC Med Genomics*. 2014; 7 Suppl 1:S4. <https://doi.org/10.1186/1755-8794-7-S1-S4> PMID: 25080202
33. Wang TN, Cheng CH, Chiu HW. Predicting post-treatment survivability of patients with breast cancer using Artificial Neural Network methods. *Conf Proc IEEE Eng Med Biol Soc*. 2015; 2013:1290–3.
34. Wang KJ, Makond B, Chen KH, Wang KM. A hybrid classifier combining SMOTE with PSO to estimate 5-year survivability of breast cancer patients. *Applied Soft Computing*. 2014; 20:15–24.

35. Chao CM, Yu YW, Cheng BW, Kuo YL. Construction the model on the breast cancer survival analysis use support vector machine, logistic regression and decision tree. *J Med Syst*. 2014; 38(10):106. <https://doi.org/10.1007/s10916-014-0106-1> PMID: 25119239
36. Garcia-Laencina PJ, Abreu PH, Abreu MH, Afonosos N. Missing data imputation on the 5-year survival prediction of breast cancer patients with unknown discrete values. *Computers in biology and medicine*. 2015; 59:125–33. <https://doi.org/10.1016/j.compbiomed.2015.02.006> PMID: 25725446
37. Lotfnezhad Afshar H, Ahmadi M, Roudbari M, Sadoughi F. Prediction of breast cancer survival through knowledge discovery in databases. *Glob J Health Sci*. 2015; 7(4):392–8. <https://doi.org/10.5539/gjhs.v7n4p392> PMID: 25946945
38. Khalkhali HR, Afshar HL, Esnaashari O, Jabbari N. Applying Data Mining Techniques to Extract Hidden Patterns about Breast Cancer Survival in an Iranian Cohort Study. *Journal of Research in Health Sciences*. 2016; 16(1):31. PMID: 27061994
39. Shawky DM, Seddik AF. On the Temporal Effects of Features on the Prediction of Breast Cancer Survivability. *Current Bioinformatics*. 2017; 12(4).
40. Sun D, Wang M, Li A. A multimodal deep neural network for human breast cancer prognosis prediction by integrating multi-dimensional data. *IEEE/ACM Trans Comput Biol Bioinform*. 2018. <https://doi.org/10.1109/TCBB.2018.2806438> PMID: 29994639
41. Sun D, Li A, Tang B, Wang M. Integrating genomic data and pathological images to effectively predict breast cancer clinical outcome. *Computer methods and programs in biomedicine*. 2018; 161:45–53. <https://doi.org/10.1016/j.cmpb.2018.04.008> PMID: 29852967
42. Zhao M, Tang Y, Kim H, Hasegawa K. Machine Learning With K-Means Dimensional Reduction for Predicting Survival Outcomes in Patients With Breast Cancer. *Cancer Inform*. 2018; 17:1176935118810215. <https://doi.org/10.1177/1176935118810215> PMID: 30455569
43. Fu B, Liu P, Lin J, Deng L, Hu K, Zheng H. Predicting Invasive Disease-Free Survival for Early-stage Breast Cancer Patients Using Follow-up Clinical Data. *IEEE Trans Biomed Eng*. 2018. <https://doi.org/10.1109/TBME.2018.2882867> PMID: 30475709
44. Lu H, Wang H, Yoon SW. A dynamic gradient boosting machine using genetic optimizer for practical breast cancer prognosis. *Expert Systems with Applications*. 2019; 116:340–50.
45. Abdikenov B, Iklassov Z, Sharipov A, Hussain S, Jamwal PK. Analytics of Heterogeneous Breast Cancer Data Using Neuroevolution. *IEEE Access*. 2019; 7:18050–60.
46. Kalafi EY, Nor NAM, Taib NA, Ganggayah MD, Town C, Dhillon SK. Machine Learning and Deep Learning Approaches in Breast Cancer Survival Prediction Using Clinical Data. *Folia biologica*. 2019; 65(5–6):212–20. PMID: 32362304
47. Shouket T, Mahmood S, Hassan MT, Iftikhar A, editors. Overall and Disease-Free Survival Prediction of Postoperative Breast Cancer Patients using Machine Learning Techniques. 2019 22nd International Multitopic Conference (INMIC); 2019.
48. Ganggayah MD, Taib NA, Har YC, Lio P, Dhillon SK. Predicting factors for survival of breast cancer patients using machine learning techniques. *BMC Med Inform Decis Mak*. 2019; 19(1):48. <https://doi.org/10.1186/s12911-019-0801-4> PMID: 30902088
49. Simsek S, Kursuncu U, Kibis E, AnisAbdellatif M, Dag A. A hybrid data mining approach for identifying the temporal effects of variables associated with breast cancer survival. *Expert Systems with Applications*. 2020; 139.
50. Salehi M, Lotfi S, Razmara J. A Novel Data Mining on Breast Cancer Survivability Using MLP Ensemble Learners. *The Computer Journal*. 2020; 63(3):435–47.
51. Tang C, Ji J, Tang Y, Gao S, Tang Z, Todo Y. A novel machine learning technique for computer-aided diagnosis. *Engineering Applications of Artificial Intelligence*. 2020; 92.
52. Hussain OI. Predicting Breast Cancer Survivability A Comparison of Three Data Mining Methods. *Cihan University-Erbil Journal of Humanities and Social Sciences*. 2020; 14(1):17–30.
53. Hickey GL, Grant SW, Murphy GJ, Bhabra M, Pagano D, McAllister K, et al. Dynamic trends in cardiac surgery: why the logistic EuroSCORE is no longer suitable for contemporary cardiac surgery and implications for future risk models. *European journal of cardio-thoracic surgery: official journal of the European Association for Cardio-thoracic Surgery*. 2013; 43(6):1146–52. <https://doi.org/10.1093/ejcts/ezs584> PMID: 23152436
54. Aj A, Pdy B, Sm C, Gkka D, Kt A. Efficient Machine Learning for Big Data: A Review. *Big Data Research*. 2015; 2(3):87–93.
55. van der Ploeg T, Austin PC, Steyerberg EW. Modern modelling techniques are data hungry: a simulation study for predicting dichotomous endpoints. *BMC medical research methodology*. 2014; 14:137. <https://doi.org/10.1186/1471-2288-14-137> PMID: 25532820

56. Razzaghi T, Roderick O, Safro I, Marko N. Multilevel Weighted Support Vector Machine for Classification on Healthcare Data with Missing Values. *PloS one*. 2016; 11(5):e0155119. <https://doi.org/10.1371/journal.pone.0155119> PMID: 27195952
57. Han J, Micheline K. Data Mining: Concepts and Techniques. *Data Mining Concepts Models Methods Algorithms Second Edition*. 2006; 5(4):1–18.
58. Pérez J, Iturbide E, Olivares V, Hidalgo M, Martínez A, Almanza N. A Data Preparation Methodology in Data Mining Applied to Mortality Population Databases. *J Med Syst*. 2015; 39(11):152. <https://doi.org/10.1007/s10916-015-0312-5> PMID: 26385549
59. Khamparia A, Singh A, Anand D, Gupta D, Khanna A, Arun Kumar N, et al. A novel deep learning-based multi-model ensemble method for the prediction of neuromuscular disorders. *Neural Computing Applications*. 2018.
60. Ko HR, Sabourin R, Britt A, editors. Combining Diversity and Classification Accuracy for Ensemble Selection in Random Subspaces. *Neural Networks, 2006 IJCNN '06 International Joint Conference on*; 2006.
61. Gang L. A review of automatic selection methods for machine learning algorithms and hyper-parameter values. *Network Modeling Analysis in Health Informatics & Bioinformatics*. 2016; 5(1):18.
62. Senanayake S, White N, Graves N, Healy H, Baboolal K, Kularatna S. Machine learning in predicting graft failure following kidney transplantation: A systematic review of published predictive models. *International journal of medical informatics*. 2019; 130:103957. <https://doi.org/10.1016/j.ijmedinf.2019.103957> PMID: 31472443
63. Christodoulou E, Ma J, Collins GS, Steyerberg EW, Verbakel JY, Van Calster B. A systematic review shows no performance benefit of machine learning over logistic regression for clinical prediction models. *Journal of clinical epidemiology*. 2019; 110:12–22. <https://doi.org/10.1016/j.jclinepi.2019.02.004> PMID: 30763612
64. Collins GS, de Groot JA, Dutton S, Omar O, Shanyinde M, Tajar A, et al. External validation of multivariable prediction models: a systematic review of methodological conduct and reporting. *BMC medical research methodology*. 2014; 14:40. <https://doi.org/10.1186/1471-2288-14-40> PMID: 24645774
65. Laupacis A, Sekar N, Stiell IG. Clinical prediction rules. A review and suggested modifications of methodological standards. *Jama*. 1997; 277(6):488–94. PMID: 9020274
66. Vergouwe Y, Moons KG, Steyerberg EW. External validity of risk models: Use of benchmark values to disentangle a case-mix effect from incorrect coefficients. *American journal of epidemiology*. 2010; 172(8):971–80. <https://doi.org/10.1093/aje/kwq223> PMID: 20807737
67. Steyerberg EW. *Clinical Prediction Models*. Springer US. 2009; <https://doi.org/10.1007/978-0-387-77244-8>
68. Steyerberg EW, Vickers AJ, Cook NR, Gerdts T, Gonen M, Obuchowski N, et al. Assessing the Performance of Prediction Models. *Epidemiology*. 2010; 21(1):128–38. <https://doi.org/10.1097/EDE.0b013e3181c30fb2> PMID: 20010215
69. Riccardo G, Anna M, Salvatore R, Franco T, Fosca G, Dino P. A Survey Of Methods For Explaining Black Box Models. *ACM Computing Surveys*. 2018; 51(5):1–42.
70. Dembrower K, Liu Y, Azizpour H, Eklund M, Strand F. Comparison of a Deep Learning Risk Score and Standard Mammographic Density Score for Breast Cancer Risk Prediction. *Radiology*. 2019; 294(2):190872. <https://doi.org/10.1148/radiol.2019190872> PMID: 31845842
71. Wang H, Li Y, Khan SA, Luo Y. Prediction of breast cancer distant recurrence using natural language processing and knowledge-guided convolutional neural network. *Artificial intelligence in medicine*. 2020; 110:101977. <https://doi.org/10.1016/j.artmed.2020.101977> PMID: 33250149
72. Lior R, Oded M. *Data Mining with Decision Trees: Theory and Applications*: WORLD SCIENTIFIC; 2007.
73. Ibrahim N, Kudus A, Daud I, Abu Bakar M. Decision Tree for Competing Risks Survival Probability in Breast Cancer Study. *Proc Wrld Acad Sci Eng Tech*. 2008.
74. Cianfrocca M, Goldstein LJ. Prognostic and predictive factors in early-stage breast cancer. *The oncologist*. 2004; 9(6):606–16. <https://doi.org/10.1634/theoncologist.9-6-606> PMID: 15561805
75. Kurt TI. Using Kaplan–Meier analysis together with decision tree methods (C&RT, CHAID, QUEST, C4.5 and ID3) in determining recurrence-free survival of breast cancer patients. *Expert Systems with Applications*. 2009.
76. Wang X, Wang N, Zhong L, Wang S, Zheng Y, Yang B, et al. Prognostic value of depression and anxiety on breast cancer recurrence and mortality: a systematic review and meta-analysis of 282,203 patients. *Molecular psychiatry*. 2020; 25(12):3186–97. <https://doi.org/10.1038/s41380-020-00865-6> PMID: 32820237

77. Escala-Garcia M, Morra A, Canisius S, Chang-Claude J, Kar S, Zheng W, et al. Breast cancer risk factors and their effects on survival: a Mendelian randomisation study. *BMC medicine*. 2020; 18(1):327. <https://doi.org/10.1186/s12916-020-01797-2> PMID: 33198768
78. Walsh C, Hripcsak G. The effects of data sources, cohort selection, and outcome definition on a predictive model of risk of thirty-day hospital readmissions. *Journal of biomedical informatics*. 2014; 52:418–26. <https://doi.org/10.1016/j.jbi.2014.08.006> PMID: 25182868
79. Collins GS, Reitsma JB, Altman DG, Moons KGM. Transparent Reporting of a Multivariable Prediction Model for Individual Prognosis or Diagnosis (TRIPOD): The TRIPOD Statement. *European Urology*. 2015; 67(6):1142–51. <https://doi.org/10.1016/j.eururo.2014.11.025> PMID: 25572824
80. Qiao N. A systematic review on machine learning in sellar region diseases: quality and reporting items. *Endocrine connections*. 2019; 8(7):952–60. <https://doi.org/10.1530/EC-19-0156> PMID: 31234143
81. Silva K, Lee WK, Forbes A, Demmer RT, Barton C, Enticott J. Use and performance of machine learning models for type 2 diabetes prediction in community settings: A systematic review and meta-analysis. *International journal of medical informatics*. 2020; 143:104268. <https://doi.org/10.1016/j.ijmedinf.2020.104268> PMID: 32950874
82. Thompson SG. Why sources of heterogeneity in meta-analysis should be investigated. *Bmj*. 1994; 309(6965):1351–5. <https://doi.org/10.1136/bmj.309.6965.1351> PMID: 7866085
83. Blettner M, Sauerbrei W, Schlehofer B, Scheuchenpflug T, Friedenreich C. Traditional reviews, meta-analyses and pooled analyses in epidemiology. *International journal of epidemiology*. 1999; 28(1):1–9. <https://doi.org/10.1093/ije/28.1.1> PMID: 10195657
